# Supplementary material for: Thermosetting polyurethanes prepared with the aid of a fully bio-based emulsifier with high bio-content, high solid content, and superior mechanical properties
Source: Royal Society of Chemistry journal article supplement (doi:10.1039/c8gc03560a), 2018-12-17
Supplement: c8gc03560a1.pdf [file c8gc03560a1.pdf]

Electronic Supplementary Material (ESI) for Green Chemistry.

This journal is © The Royal Society of Chemistry 2018

## **Electronic Supplementary Information**

### **Thermosetting polyurethanes prepared with the aid of a fully bio-based emulsifier with high bio-content, high solid content, and superior mechanical properties**

Lingxiao Liu<sup>a</sup>, Jingyi Lu<sup>a</sup>, Yi Zhang<sup>a</sup>, Haiyan Liang<sup>a</sup>, Dunsheng Liang<sup>a</sup>, Jizhou Jiang<sup>b</sup>, Qiming Lu<sup>a</sup>, Rafael L. Quirino<sup>c</sup>, Chaoqun Zhang<sup>a,\*</sup>

<sup>a</sup>College of Materials and Energy, South China Agricultural University, Guangzhou 510642, China

<sup>b</sup>School of Environmental Ecology and Biological Engineering, Wuhan Institute of Technology, Wuhan 430205, China

<sup>c</sup>Department of Chemistry, Georgia Southern University, Statesboro, GA 30460, USA

\*Corresponding authors. E-mail: [zhangcq@scau.edu.cn](mailto:zhangcq@scau.edu.cn) or [nwpuzcq@gmail.com](mailto:nwpuzcq@gmail.com)

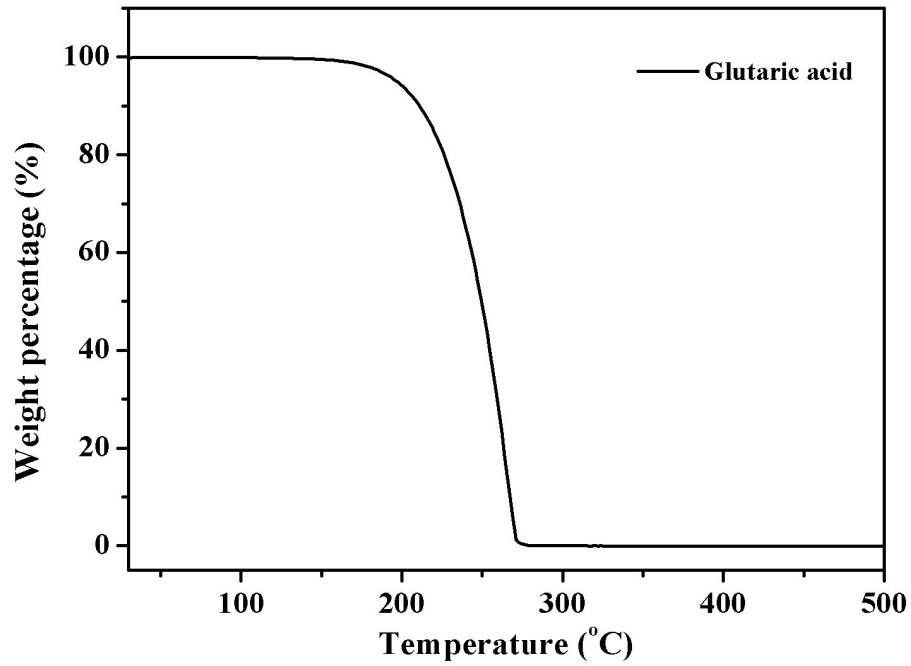

Fig. S1 TGA curves for glutaric acid

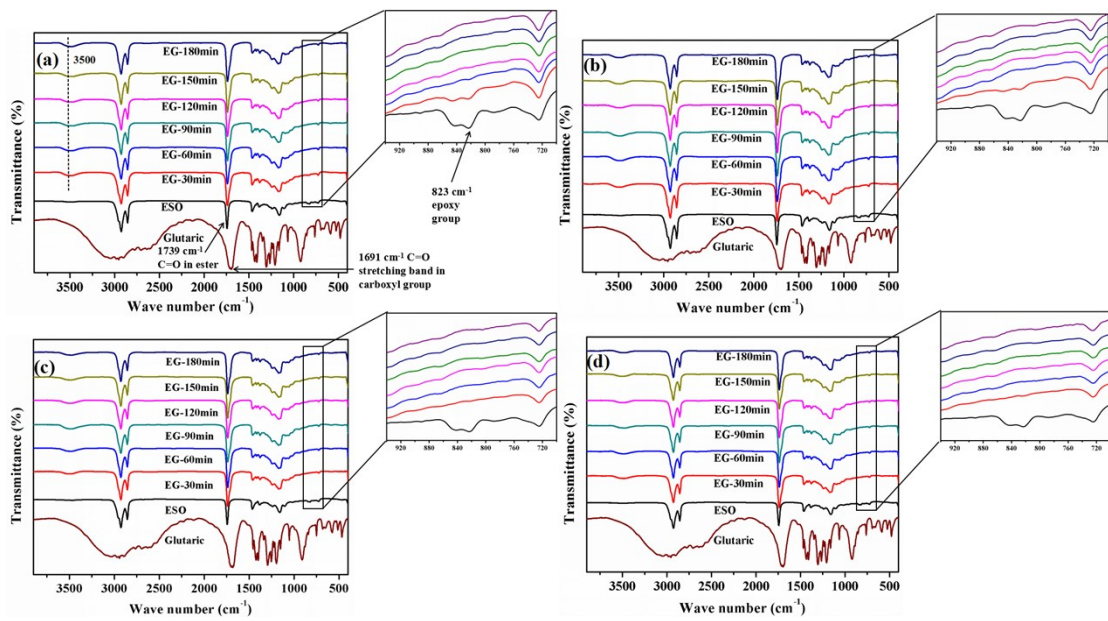

Fig. S2 FTIR spectra of the emulsifier for different reaction time with different ratios of carboxyl to epoxy groups (a) R=2, (b) R=3, (c) R=4, and (d) R=5.

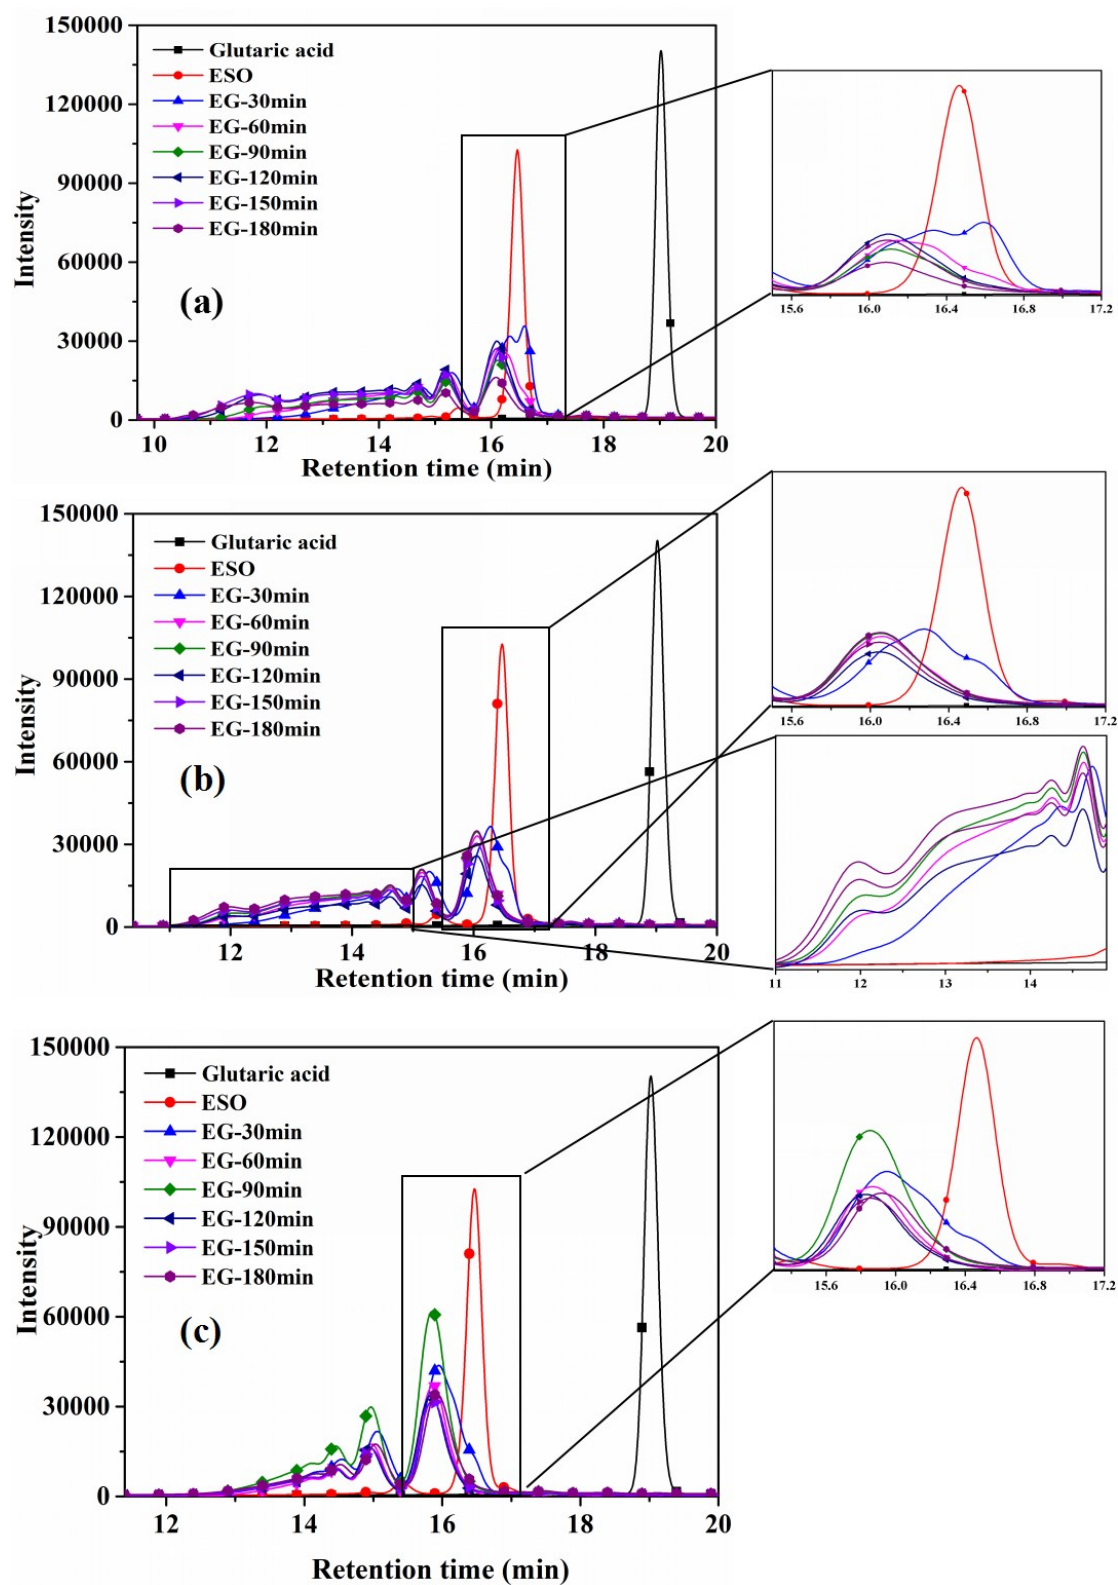

**Fig. S3** GPC curves of the emulsifier for different reaction time with different ratios of carboxyl to epoxy groups (a)  $R=2$ , (b)  $R=3$ , and (c)  $R=5$ .

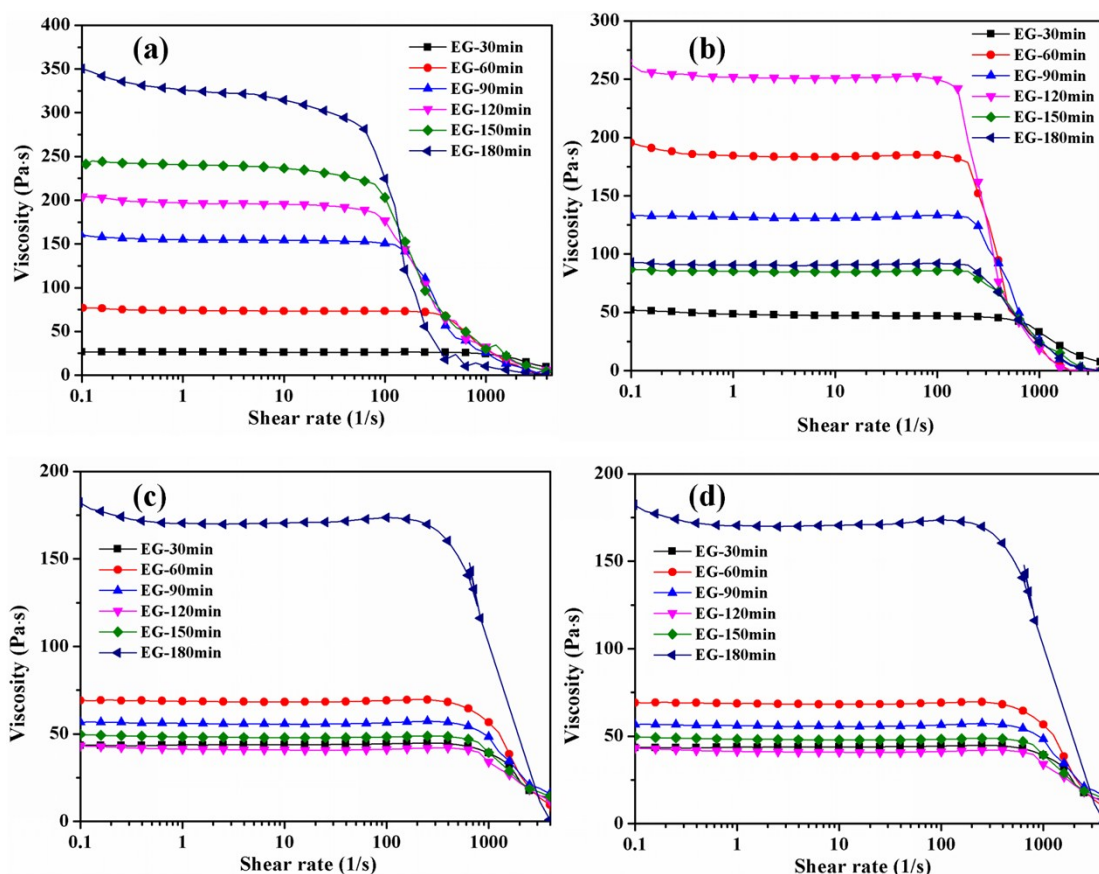

**Fig. S4** Rheological behavior of the emulsifier prepared for different reaction time with different ratios of carboxyl to epoxy groups (a) R=2, (b) R=3, (c) R=4, and (d) R=5.

**Table S1.** Viscosity of the emulsifier at different molar ratio of carboxyl to epoxy groups for different reaction time when shear rate was  $25 \text{ s}^{-1}$ .

| Reaction time<br>(min) | Viscosity of<br>EG-2 (Pa · s) | Viscosity of<br>EG-3 (Pa · s) | Viscosity of<br>EG-4 (Pa · s) | Viscosity of<br>EG-5 (Pa · s) |
|------------------------|-------------------------------|-------------------------------|-------------------------------|-------------------------------|
| 30                     | 26.3                          | 47.06                         | 43.91                         | 48.87                         |
| 60                     | 73.32                         | 184.1                         | 68.33                         | 95.13                         |
| 90                     | 153.9                         | 131.5                         | 55.64                         | 105.9                         |
| 120                    | 193.8                         | 251.5                         | 40.71                         | 66.18                         |
| 150                    | 231.3                         | 84.9                          | 47.93                         | 97.13                         |
| 180                    | 302.3                         | 91.17                         | 171.1                         | 135.7                         |
